# Supplementary material for: Robustness of Automated Methods for Brain Volume Measurements across Different MRI Field Strengths
Source: PLoS One. 2016 Oct 31;11(10):e0165719. doi: 10.1371/journal.pone.0165719 (PMC5087903; doi:10.1371/journal.pone.0165719)
Supplement: S2 Dataset — TBV: total brain volume. SGM: supratentorial gray matter volume. SWM: supratentorial white matter volume. CSF: cerebrospinal fluid volume. ICV: intracranial volume. DSC: Dice’s similarity coefficient. (XLSX) [file pone.0165719.s002.xlsx]

## Sheet: Accuracy_data
Patient_ID	Age (years)	Sex	TBV_Manual_Segmentation	SGM_volume_Manual_Segmentation	SWM_volume_Manual_Segmentation	CSF_volume_Manual_Segmentation	Cerebellar_and_brainstem_volume_Manual_Segmentation	ICV_Manual_Segmentation	TBV_SPM	SGM_volume_SPM	SWM_volume_SPM	CSF_volume_SPM	ICV_SPM	DSC_TBV_SPM	DSC_SGM_SPM	DSC_SWM_SPM	DSC_CSF_SPM	DSC_ICV_SPM	Total_brain_volume_FSL	SGM_volume_FSL	SWM_volume_FSL	CSF_volume_FSL	ICV_FSL	DSC_TBV_FSL	DSC_SGM_FSL	DSC_SWM_FSL	DSC_CSF_FSL	DSC_ICV_FSL	TBV_FS	GM_volume_FS	WM_volume_FS	CSF_volume_FS	ICV_FS	DSC_TBV_FS	DSC_SGM_FS	DSC_SWM_FS	DSC_CSF_FS	DSC_ICV_FS
1	73.4867	Male	934.788	462.521	343.254	451.691	129.013	1386.48	940.378	464.764	360.697	374.089	1314.47	0.945702	0.793985	0.855056	0.76229	0.95678	970.535	440.474	424.883	421.855	1392.39	0.941795	0.762368	0.847433	0.750399	0.953756	928.469	407.302	360.447	554.085	1482.55	0.928283	0.777442	0.856864	0.701475	0.930353
2	68.6626	Female	1132.78	584.332	396.769	311.231	151.682	1444.01	1111.44	582.778	389.52	236.729	1348.17	0.952682	0.835681	0.875539	0.615703	0.949636	1099.72	516.549	462.547	386.857	1486.58	0.949831	0.813377	0.873525	0.688816	0.959356	1043.2	518.001	393.008	468.581	1511.78	0.931084	0.801148	0.861018	0.613755	0.938308
3	75.4606	Female	860.22	442.693	296.89	365.828	120.637	1226.05	864.378	463.346	288.338	217.868	1082.25	0.939529	0.793101	0.845448	0.594144	0.928206	865.93	408.346	355.967	337.271	1203.2	0.937111	0.774692	0.85355	0.655142	0.937042	812.232	419.049	273.187	423.859	1236.09	0.919314	0.758947	0.821579	0.635066	0.926159
4	76.1342	Female	1112.1	601.032	358.723	423.605	152.347	1535.71	998.79	494.948	376.213	475.588	1474.38	0.928516	0.765102	0.797176	0.742686	0.960145	1095.53	500.442	470.132	469.503	1565.03	0.935056	0.728347	0.770882	0.736153	0.955527	1020.33	482.525	367.71	659.958	1680.29	0.913864	0.746621	0.803033	0.645389	0.922815
5	76.835	Female	967.606	451.127	379.54	408.013	136.939	1375.62	969.856	470.856	378.816	344.214	1314.07	0.936258	0.779953	0.868143	0.726911	0.958859	995.675	448.746	434.871	429.05	1424.73	0.934022	0.754452	0.858108	0.720133	0.950278	951.115	406.327	357.816	488.145	1439.26	0.913215	0.741045	0.853006	0.641479	0.926245
6	75.1075	Male	1031.71	540.423	340.114	401.891	151.178	1433.61	1078.13	502.037	433.587	367.768	1445.9	0.932126	0.732752	0.79115	0.717806	0.963842	1069.09	522.792	419.935	432.438	1501.53	0.927013	0.736095	0.789672	0.70785	0.952681	1008.01	467.895	402.847	565.211	1573.22	0.922149	0.757935	0.831085	0.649028	0.9267
7	72.9774	Female	876.767	475.248	289.478	408.707	112.04	1285.47	951.12	518.929	327.294	290.959	1242.08	0.931323	0.741312	0.775575	0.687182	0.950513	902.851	419.048	391.518	362.317	1265.17	0.944117	0.765503	0.821534	0.723441	0.948369	880.311	415.119	327.453	406.616	1286.93	0.926454	0.77247	0.826635	0.677998	0.930121
8	66.5325	Female	991.128	445.109	413.331	314.394	132.688	1305.52	1015.55	475.171	421.114	307.893	1323.44	0.946545	0.788785	0.869277	0.709173	0.959277	1004.63	460.85	438.422	365.282	1369.91	0.944636	0.791808	0.884348	0.688084	0.95383	958.519	435.612	392.14	404.11	1362.63	0.932662	0.78934	0.881089	0.644496	0.94118
9	66.3162	Female	1105.06	614.582	346.536	399.163	143.937	1504.22	1095.88	538.397	424.966	307.995	1403.87	0.950451	0.793074	0.810839	0.721676	0.95054	1051.88	485.9	451.542	410.441	1462.33	0.94384	0.782231	0.824568	0.66437	0.942526	994.77	473.747	367.302	497.005	1491.78	0.915403	0.772688	0.838051	0.639482	0.942391
10	65.6208	Female	988.325	494.512	377.317	540.577	116.496	1528.9	1093.15	575.306	407.729	365.321	1458.48	0.928284	0.746957	0.831511	0.727359	0.956118	1027.71	494.328	441.081	453.242	1480.95	0.939968	0.783647	0.864889	0.713268	0.93769	979.312	455.656	375.061	546.763	1526.08	0.925363	0.768989	0.85326	0.71216	0.935584
11	67.5428	Male	1096.45	578.2	354.726	395.013	163.526	1491.46	1019.86	499.101	377.404	497.34	1517.2	0.938351	0.805433	0.845529	0.735755	0.955634	1097.87	499.608	460.953	459.09	1556.96	0.935088	0.761388	0.812813	0.717783	0.949645	1016.07	467.204	388.078	646.952	1663.02	0.909764	0.754806	0.841918	0.637546	0.925922
12	67.1348	Male	1129.45	514.381	450.548	321.423	164.519	1450.87	1091.76	523.126	431.959	287.259	1379.02	0.945467	0.808765	0.888959	0.686568	0.962592	1098.87	475.709	497.737	376.389	1475.26	0.94829	0.803246	0.894488	0.674318	0.95685	1080.49	452.515	463.387	479.826	1560.32	0.931546	0.786245	0.88648	0.597707	0.925389
13	67.1677	Male	1111.84	578.648	361.709	355.22	171.481	1467.06	1078.37	557.4	363.759	269.703	1348.07	0.952522	0.849188	0.888253	0.660478	0.945828	1073.72	491.867	439.618	387.521	1461.24	0.947524	0.812173	0.870008	0.691374	0.952732	1028.73	480.681	384.012	504.969	1533.7	0.929258	0.804686	0.868591	0.638973	0.937178
14	67.666	Male	1118.82	611.449	363.087	459.238	144.282	1578.06	1117.71	583.294	401.092	246.097	1363.81	0.951396	0.829087	0.86106	0.607482	0.922286	1087.36	484.057	487.079	433.791	1521.15	0.946591	0.776041	0.829324	0.688648	0.940153	1049.82	460.401	413.223	582.794	1632.61	0.921633	0.770445	0.845582	0.669197	0.938504
15	68.8871	Male	1215.83	547.845	515.246	422.065	152.743	1637.9	1164.24	583.123	444.222	312.183	1476.42	0.946618	0.797629	0.873713	0.659408	0.941204	1182.07	538.414	524.473	468.161	1650.23	0.934346	0.780344	0.893204	0.669431	0.941032	1137.41	490.581	484.779	606.867	1744.27	0.927762	0.779807	0.892594	0.63412	0.929132
16	71.0965	Female	1059.52	577.558	346.919	275.694	135.041	1335.21	1097.51	577.398	394.918	211.494	1309	0.949481	0.823154	0.849615	0.633277	0.955483	1041.67	497.588	436.69	363.805	1405.48	0.949796	0.806898	0.845484	0.66634	0.954053	982.356	495.004	382.85	446.506	1428.86	0.934179	0.812279	0.856688	0.568082	0.921693
17	73.7906	Female	939.912	474.681	310.537	382.221	154.694	1322.13	937.294	475.973	322.425	326.311	1263.6	0.947065	0.819542	0.859424	0.73302	0.958596	968.845	439.935	398.114	364.826	1333.67	0.943692	0.771457	0.835881	0.691848	0.949799	896.898	443.103	299.144	493.985	1390.88	0.923902	0.790276	0.843237	0.650258	0.926666
18	72.1944	Male	1157.69	541.569	471.248	522.536	144.869	1680.22	1170.9	522.249	517.221	473.23	1644.13	0.942539	0.766099	0.848379	0.77843	0.966741	1222.27	546.404	562.065	507.825	1730.1	0.931256	0.714401	0.824221	0.734815	0.953424	1177.18	500.169	512.011	635.155	1812.34	0.919457	0.731636	0.848801	0.698661	0.933853
19	69.117	Male	1002.7	474.868	393.777	432.328	134.055	1435.03	1016.73	535.632	356.673	256.318	1273.05	0.946737	0.807733	0.868758	0.62637	0.932462	980.14	453.78	420.285	415.75	1395.89	0.940244	0.78735	0.877856	0.671678	0.937059	934.325	424.382	359.345	557.111	1491.44	0.917479	0.76351	0.863217	0.638426	0.91725
20	67.6988	Male	1040.47	546.17	354.796	470.36	139.504	1510.83	1083.43	580.07	382.483	301.914	1385.34	0.936733	0.770109	0.804918	0.695724	0.951544	1051.91	497.518	445.856	417.317	1469.23	0.940726	0.767865	0.821546	0.704448	0.94745	996.095	479.588	373.642	494.995	1491.09	0.926201	0.772714	0.822653	0.692503	0.93833
